# Supplementary material for: Systematic decomposition of sequence determinants governing CRISPR/Cas9 specificity
Source: PubMed Central journal article supplement (PMC8789861; doi:10.1038/s41467-022-28028-x), 2022-01-25
Supplement: 41467_2022_28028_MOESM11_ESM.pdf [file 41467_2022_28028_MOESM11_ESM.pdf]

**Title:** Supplementary Data 1:

**Description:** Screening data of all gRNA-target pairs for three libraries (Lib T1-3) using dual-target system.

**Title:** Supplementary Data 2:

**Description:** Screening data of all gRNA-target pairs for one library (Lib S1) using single-target system.

**Title:** Supplementary Data 3:

**Description:** Screening data of six libraries (Lib sg1-6) using single-target system.

**Title:** Supplementary Data 4:

**Description:** Screening data of all the 1-mismatch gRNA-target pairs in three dual-target libraries, which were used for the decomposition of 1-mismatch-dependent effects and guide-intrinsic mismatch tolerance (GMT).

**Title:** Supplementary Data 5:

**Description:** Screening data for allele-specific editing library (Lib Allele) using dual-target system.

**Title:** Supplementary Data 6:

**Description:** Summary of the detailed components in each designed library.

**Title:** Supplementary Data 7:

**Description:** Oligos and primers used for experiments.
